# Supplementary material for: Separation of the Azeotropic Mixture Methanol and Toluene Using Extractive Distillation: Entrainer Determination, Vapor–Liquid Equilibrium Measurement, and Modeling
Source: PubMed Central journal article supplement — ACS Omega. 2021 Dec 9;6(50):34736–43. doi: 10.1021/acsomega.1c05164 (PMC8697408; doi:10.1021/acsomega.1c05164), 2021-12-09
Supplement: ao1c05164_si_001.pdf [file ao1c05164_si_001.pdf]

# Supporting Information

## **Separation of Azeotropic Mixture Methanol and Toluene Using Extractive Distillation: Entrainers Determination, Vapor-liquid Equilibrium Measurement and Modelling**

Shanshan He <sup>a</sup>, Wenyang Fan <sup>a</sup>, Huiwen Huang <sup>a</sup>, Jun Gao <sup>a</sup>, Dongmei Xu <sup>a, \*</sup>, Yixin Ma <sup>a</sup>, Lianzheng Zhang <sup>a</sup>, Yinglong Wang <sup>b</sup>

<sup>a</sup> College of Chemical and Biological Engineering, Shandong University of Science and Technology, Qingdao 266590, China

<sup>b</sup> College of Chemical Engineering, Qingdao University of Science and Technology, Qingdao 266042, China

\* Corresponding author

Email address: xudongmei.cn@163.com

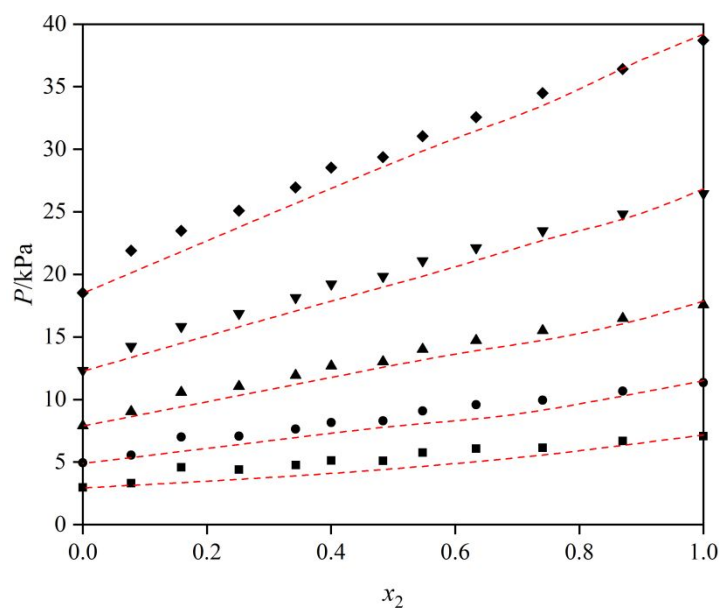

Figure S1. Comparison of the predicted experimental vapor pressures with the reference data for the mixture toluene + triethylamine: (■), 293.15 K from ref. 34; (●), 303.15 K from ref. 34; (▲), 313.15 K from ref. 34; (▼), 323.15 K from ref. 34; (◆), 333.15 K from ref. 34; (---); predicted data of Wilson model parameters.

Table S1. Experimental isobaric VLE data of the mixture methanol (1) + toluene (2) + butyl butanoate (3) under 101.3 kPa.<sup>a</sup>

| T/K    | x      |        |        | y      |        |        | $\alpha_{12}$ |
|--------|--------|--------|--------|--------|--------|--------|---------------|
|        | $x_1$  | $x_2$  | $x_3$  | $y_1$  | $y_2$  | $y_3$  |               |
| 348.26 | 0.2408 | 0.2574 | 0.5018 | 0.8807 | 0.0960 | 0.0233 | 9.57          |
| 350.34 | 0.2044 | 0.2615 | 0.5341 | 0.8690 | 0.1026 | 0.0284 | 10.54         |
| 353.51 | 0.1703 | 0.2691 | 0.5606 | 0.8495 | 0.1175 | 0.0330 | 11.29         |
| 357.19 | 0.1363 | 0.2724 | 0.5913 | 0.8284 | 0.1317 | 0.0399 | 12.01         |
| 366.37 | 0.0896 | 0.2742 | 0.6362 | 0.7652 | 0.1699 | 0.0649 | 13.10         |
| 375.82 | 0.0566 | 0.2648 | 0.6786 | 0.6880 | 0.2152 | 0.0968 | 14.61         |
| 384.08 | 0.0422 | 0.2469 | 0.7109 | 0.6035 | 0.2559 | 0.1406 | 15.83         |
| 393.46 | 0.0285 | 0.2162 | 0.7553 | 0.5067 | 0.2886 | 0.2047 | 17.22         |
| 402.67 | 0.0152 | 0.1808 | 0.8040 | 0.4086 | 0.2965 | 0.2949 | 18.98         |

<sup>a</sup> The standard uncertainties of  $u$  are  $u(P)=0.35$  kPa,  $u(T)=0.35$  K,  $u(x)=0.0069$  and  $u(y)=0.0062$ . The feed ratio (mole fraction) of methanol: toluene: butyl butanoate is 0.25: 0.25: 0.5.

Table S2. Isobaric VLE data of the mixture methanol (1) + toluene (2) + butyl butanoate (3) predicted by the NRTL and UNIFAC models under 101.3 kPa.<sup>a</sup>

| <i>T</i> /K  | <i>x</i>              |                       |                       | <i>y</i>              |                       |                       |
|--------------|-----------------------|-----------------------|-----------------------|-----------------------|-----------------------|-----------------------|
|              | <i>x</i> <sub>1</sub> | <i>x</i> <sub>2</sub> | <i>x</i> <sub>3</sub> | <i>y</i> <sub>1</sub> | <i>y</i> <sub>2</sub> | <i>y</i> <sub>3</sub> |
| NRTL model   |                       |                       |                       |                       |                       |                       |
| 348.26       | 0.2331                | 0.2572                | 0.5097                | 0.8825                | 0.0956                | 0.0219                |
| 350.34       | 0.2019                | 0.2652                | 0.5329                | 0.8700                | 0.1030                | 0.0270                |
| 353.51       | 0.1668                | 0.2731                | 0.5601                | 0.8542                | 0.1155                | 0.0303                |
| 357.19       | 0.1312                | 0.2782                | 0.5906                | 0.8308                | 0.1319                | 0.0373                |
| 366.37       | 0.0899                | 0.2786                | 0.6315                | 0.7687                | 0.1710                | 0.0603                |
| 375.82       | 0.0512                | 0.2631                | 0.6857                | 0.6833                | 0.2215                | 0.0952                |
| 384.08       | 0.0387                | 0.2443                | 0.7170                | 0.6065                | 0.2544                | 0.1391                |
| 393.46       | 0.0221                | 0.2135                | 0.7644                | 0.5042                | 0.2855                | 0.2103                |
| 402.67       | 0.0141                | 0.1750                | 0.8109                | 0.4055                | 0.2966                | 0.2979                |
| UNIFAC model |                       |                       |                       |                       |                       |                       |
| 348.26       | 0.2399                | 0.2525                | 0.5076                | 0.8793                | 0.0967                | 0.0240                |
| 350.34       | 0.2066                | 0.2602                | 0.5332                | 0.8688                | 0.1038                | 0.0274                |
| 353.51       | 0.1690                | 0.2681                | 0.5629                | 0.8516                | 0.1155                | 0.0329                |
| 357.19       | 0.1374                | 0.2733                | 0.5893                | 0.8298                | 0.1300                | 0.0402                |
| 366.37       | 0.0877                | 0.2750                | 0.6373                | 0.7663                | 0.1703                | 0.0634                |
| 375.82       | 0.0578                | 0.2651                | 0.6771                | 0.6869                | 0.2156                | 0.0975                |
| 384.08       | 0.0407                | 0.2478                | 0.7115                | 0.6072                | 0.2538                | 0.1390                |
| 393.46       | 0.0272                | 0.2179                | 0.7549                | 0.5085                | 0.2873                | 0.2042                |
| 402.67       | 0.0180                | 0.1787                | 0.8033                | 0.4079                | 0.2985                | 0.2936                |

<sup>a</sup> The feed ratio (mole fraction) of methanol: toluene: butyl butanoate is 0.25: 0.25: 0.5.
